# Supplementary material for: GEO4PALM v1.1: an open-source geospatial data processing toolkit for the PALM model system
Source: Copernicus journal article supplement (doi:10.5194/gmd-17-815-2024), 2024-01-31
Supplement: Supplementary file 1 [file gmd-17-815-2024-supplement.zip]

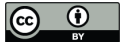

## *Supplement of*

# **GEO4PALM v1.1: an open-source geospatial data processing toolkit for the PALM model system**

**Dongqi Lin et al.**

*Correspondence to:* Dongqi Lin ([dongqi.lin@canterbury.ac.nz](mailto:dongqi.lin@canterbury.ac.nz))

- `gmd-17-815-2024-supplement-title-page.pdf`
- `supplements`
  - `GEO4PALM_PALM_CSD_input`
    - \* `README.txt`
    - \* `config.static-Berlin_GEO`
    - \* `config.static-Berlin_OL`
    - \* `config.static-Chch_GEO`
    - \* `config.static-Chch_OL`
    - \* `csd_berlin-revision.config`
    - \* `csd_chch.config`
  - `PALM_simulation_input`
    - \* `Berlin_csd_case_geo`
    - \* `Berlin_dlr_case_geo`
    - \* `Berlin_online_case_geo`
    - \* `Chch_csd_case_geo`
    - \* `Chch_online_case_geo`
    - \* `Christchurch_case_geo`
    - \* `README.txt`

The copyright of individual parts of the supplement might differ from the article licence.
